# Supplementary material
Source: HighWire-hosted journal article supplement (http://www.ajevonline.org/highwire/filestream/1924/field_highwire_adjunct_files/0/ajev.2014.13137_SupplementalTable_1.pdf)
Supplement: ajev.2014.13137_SupplementalTable_1.pdf [file ajev.2014.13137_SupplementalTable_1.pdf]

# Supplemental Data for:

Boss, P.K., C. Böttcher, and C. Davies. 2014.

Various influences of harvest date and fruit sugar content on different wine flavor and aroma compounds.

Am. J. Enol. Vitic. 65:341-353. doi: 10.5344/ajev.2014.13137.

**Supplemental Table 1** Volatile compounds in the headspace of the Riesling wines not found to be significantly different ( $p < 0.05$ ) due to Brix or harvest date.

| Compound                                          | RT <sup>a</sup> | Compound ID <sup>b</sup> |
|---------------------------------------------------|-----------------|--------------------------|
| <b>Quantified using d16-octanal standard</b>      |                 |                          |
| 3-Methyl butanal                                  | 912             | A                        |
| 3-Hydroxy 2-butanone                              | 1274            | A                        |
| 6-Methyl-5-hepten-2-one                           | 1320            | A                        |
| 2-Nonanone                                        | 1371            | A                        |
| $\gamma$ -Butyrolactone                           | 1609            | A                        |
| 4-Methyl benzaldehyde,                            | 1625            | B                        |
| Acetophenone                                      | 1628            | B                        |
| Ethyl phenyl ketone                               | 1700            | B                        |
| <b>Quantified using d13-hexanol standard</b>      |                 |                          |
| 2-Methyl-1-propanol                               | 1111            | A                        |
| 4-Methyl-1-pentanol                               | 1297            | A                        |
| 2-Ethyl-1-hexanol                                 | 1468            | A                        |
| 2,3-Butanediol                                    | 1519            | A                        |
| meso-2,3-Butanediol                               | 1554            | A                        |
| <b>Quantified using d3-linalool standard</b>      |                 |                          |
| $\alpha$ -Terpineol                               | 1679            | A                        |
| <b>Quantified using methyl nonanoate standard</b> |                 |                          |
| Ethyl propanoate                                  | 955             | A                        |
| Ethyl isobutyrate                                 | 963             | A                        |
| Methyl butanoate                                  | 982             | B                        |
| Decane                                            | 1000            | A                        |
| Toluene                                           | 1039            | A                        |
| 2-Methylethyl butanoate                           | 1055            | A                        |
| Ethyl 3-methyl butanoate                          | 1073            | A                        |
| 1-Ethoxy-1-pentoxyethane                          | 1110            | B                        |
| $\beta$ -Pinene                                   | 1134            | A                        |
| $\beta$ -Myrcene                                  | 1153            | A                        |
| Methyl hexanoate                                  | 1175            | A                        |
| Limonene                                          | 1177            | A                        |
| Vitispirane II                                    | 1510            | B                        |
| 3-Methylbutyl octanoate                           | 1638            | A                        |
| Ethyl phenyl acetate                              | 1761            | A                        |
| Ethyl 4-hydroxybutanoate                          | 1777            | B                        |
| Hexyl octanoate                                   | 1785            | B                        |
| Ethyl dodecanoate                                 | 1817            | A                        |
| Isoamyl decanoate                                 | 1836            | B                        |
| 2-Ethyl-3-hydroxyhexyl 2-methylpropanoate         | 1840            | B                        |
| 2-Phenylethyl propanoate                          | 1856            | B                        |
| Ethyl tetradecanoate                              | 2010            | A                        |
| 2-Phenylethyl hexanoate                           | 2113            | B                        |
| 1,2-Dimethyl-4-(dimethoxymethyl)benzene           | 2115            | B                        |
| 2-Phenylethyl octanoate                           | 2248            | A                        |

<sup>a</sup>RI calculated from retention relative to the retention of a series of *n*-alkanes (C<sub>8</sub>–C<sub>26</sub>).

<sup>b</sup>A: identity confirmed by matching mass spectra and RI with that of authentic standards; B: tentative assignment based on comparison with mass spectral libraries and published LRI.
